# Supplementary material for: Studies of EEG Asymmetry and Depression: To Normalise or Not?
Source: MDPI journal article supplement (doi:10.3390/sym15091689), 2023-09-02

Figure S1. Frequency distribution histograms for raw (untransformed), log-transformed, and RIN-transformed FP1 EEG site data for eyes-closed condition ( $n = 98$ ).

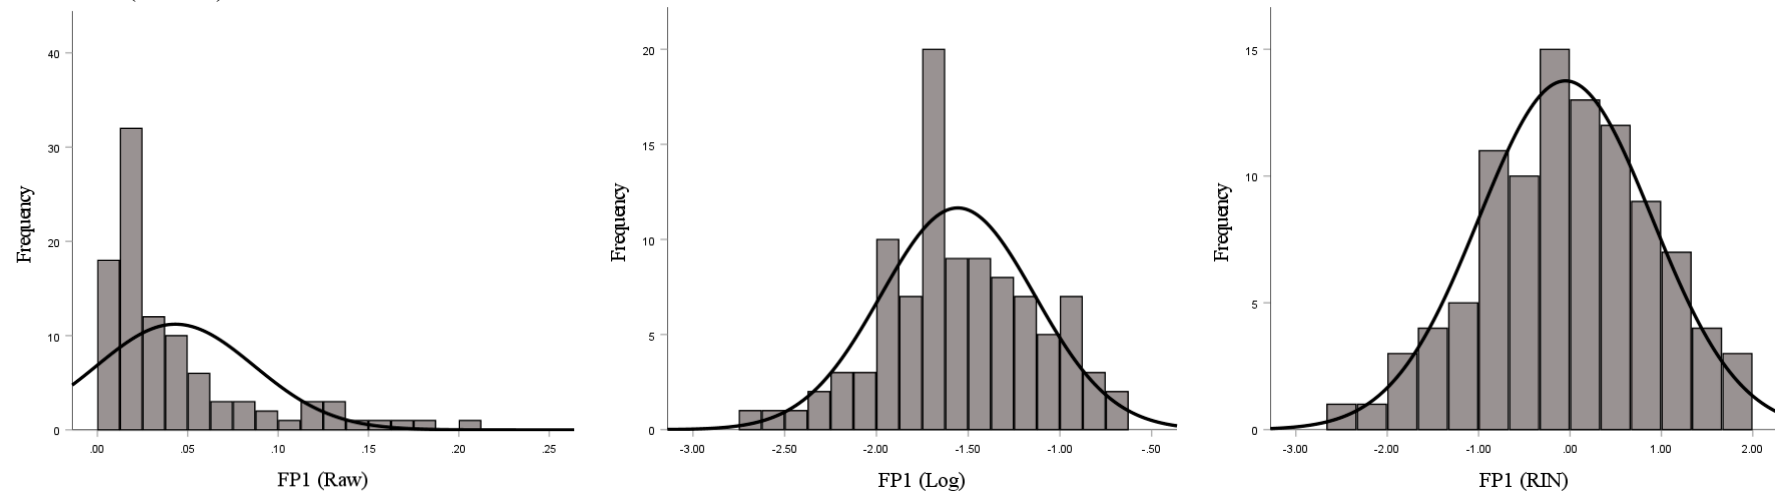

Figure S2. Frequency distribution histograms for raw (untransformed), log-transformed, and RIN-transformed FP2 EEG site data for eyes-closed condition ( $n = 98$ ).

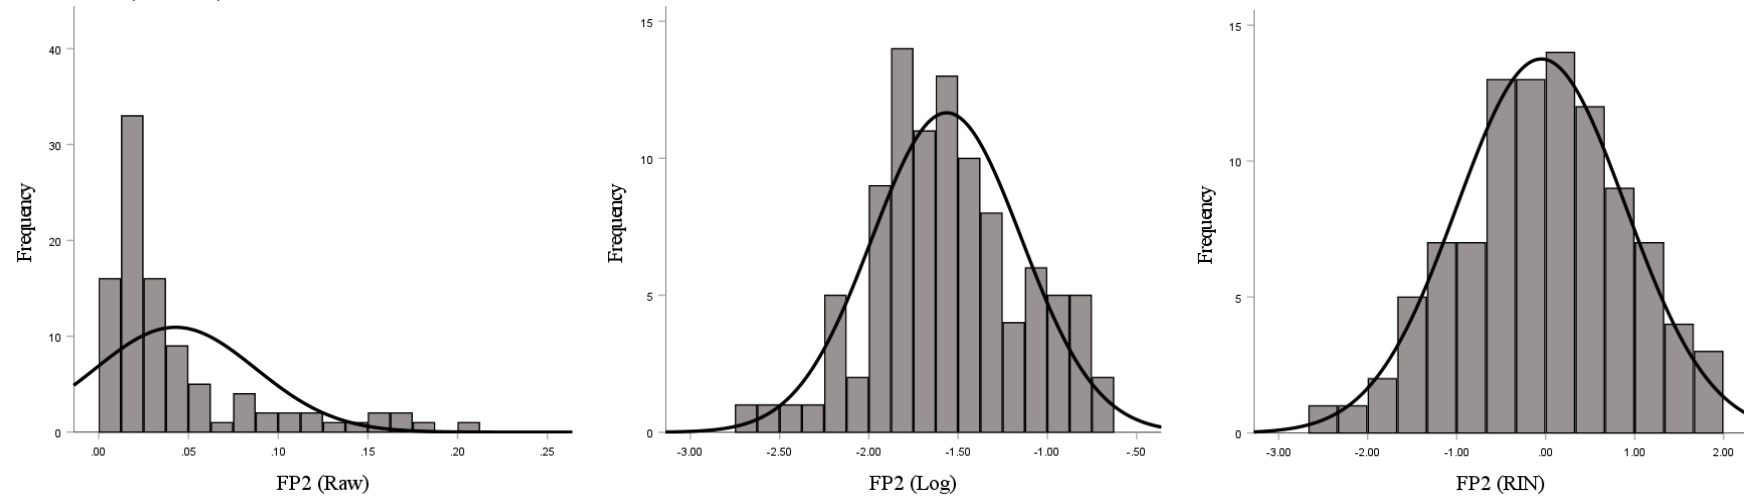

Figure S3. Frequency distribution histograms for raw (untransformed), log-transformed, and RIN-transformed F3 EEG site data for eyes-closed condition ( $n = 98$ ).

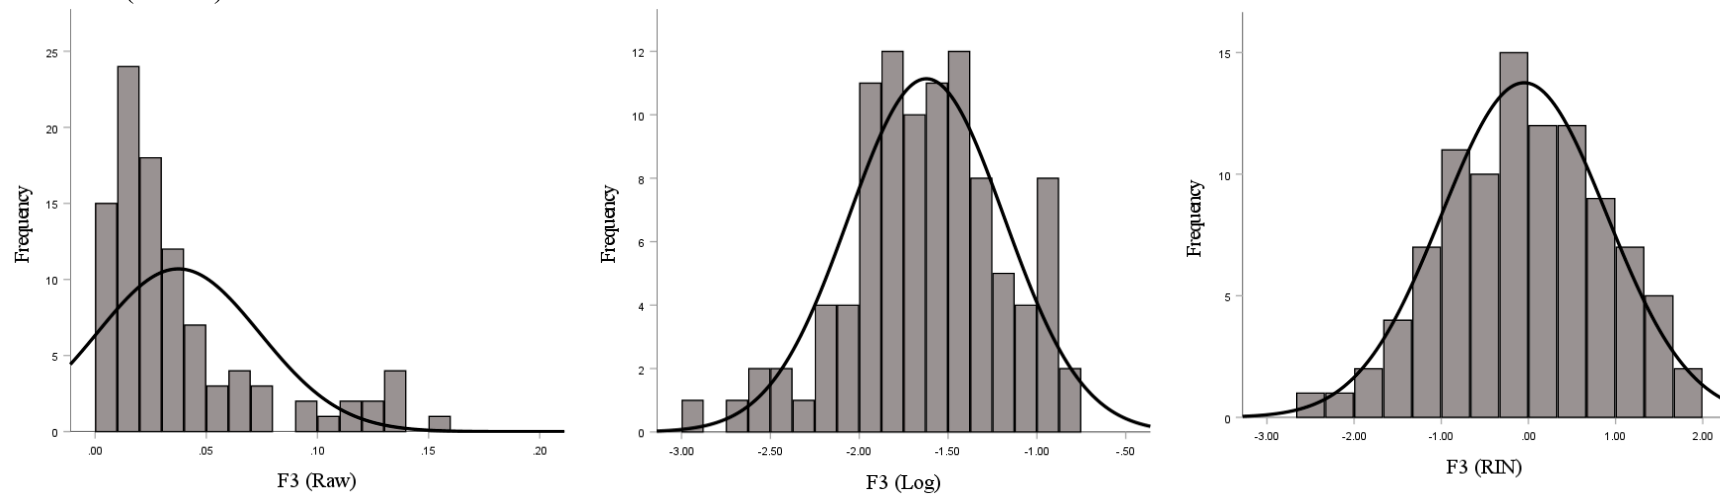

Figure S4. Frequency distribution histograms for raw (untransformed), log-transformed, and RIN-transformed F4 EEG site data for eyes-closed condition ( $n = 98$ ).

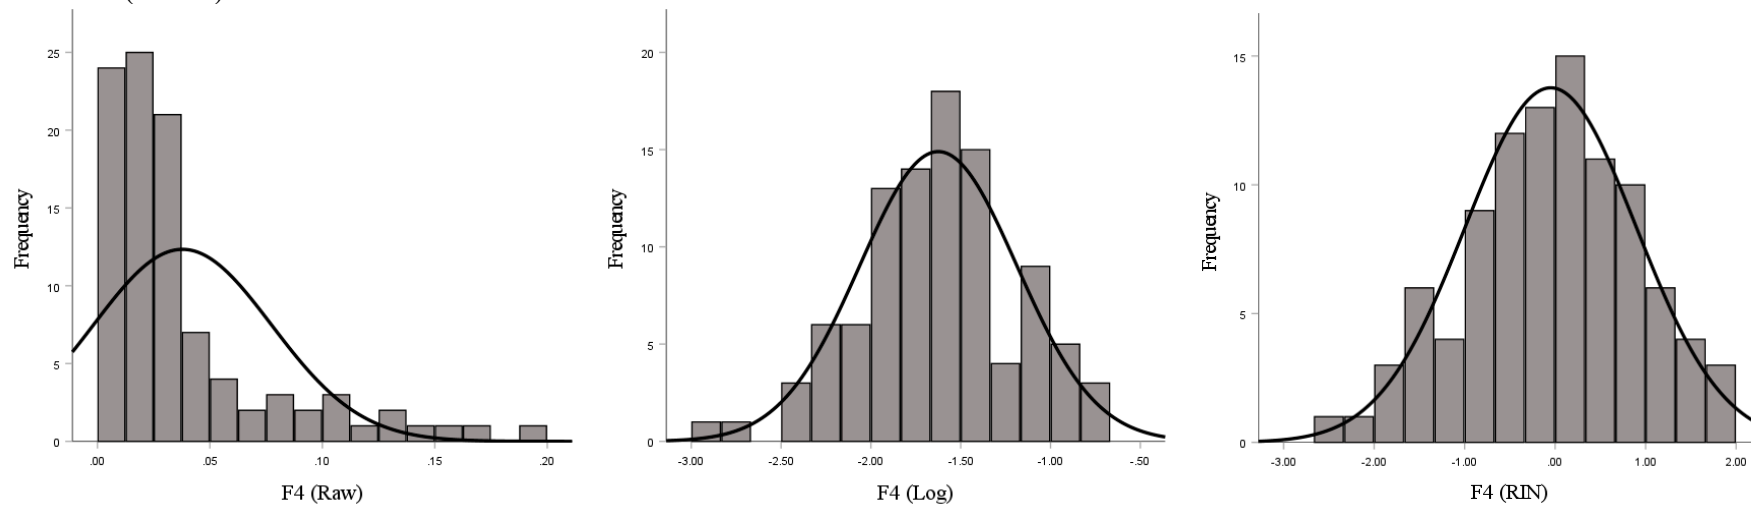

Figure S5. Frequency distribution histograms for raw (untransformed), log-transformed, and RIN-transformed F7 EEG site data for eyes-closed condition ( $n = 98$ ).

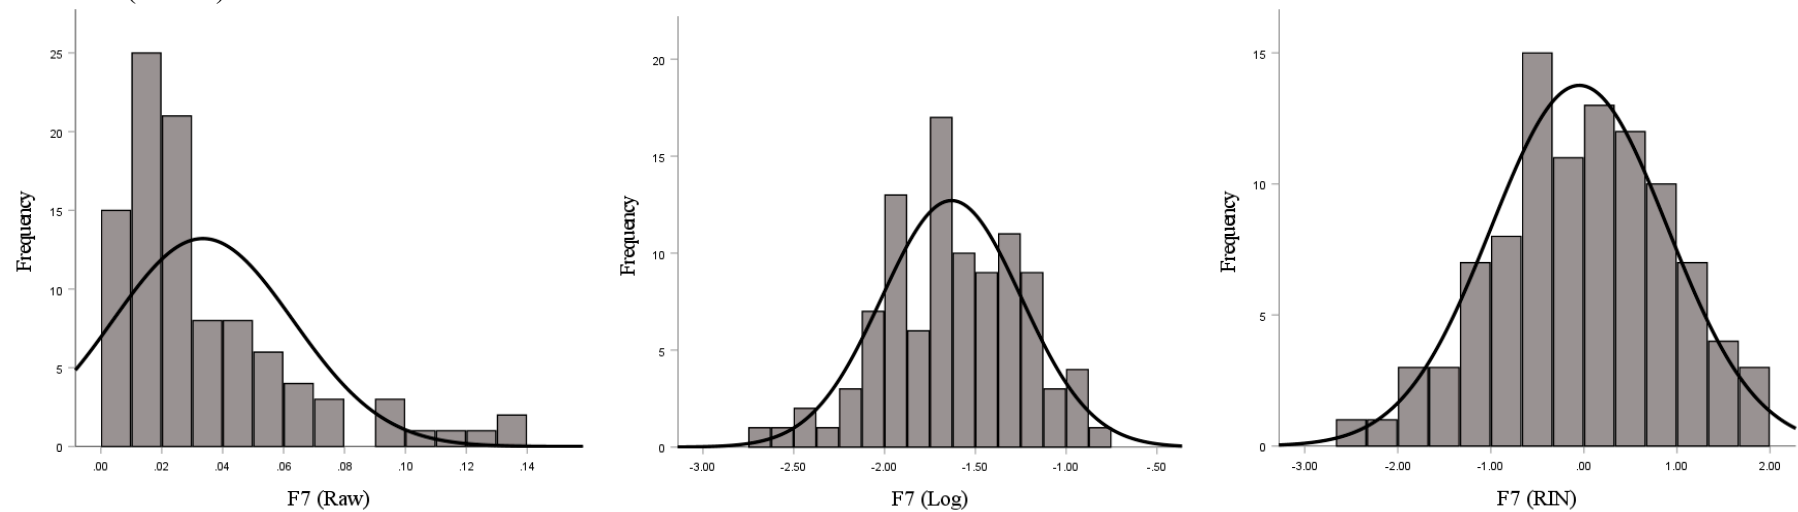

Figure S6. Frequency distribution histograms for raw (untransformed), log-transformed, and RIN-transformed F8 EEG site data for eyes-closed condition ( $n = 98$ ).

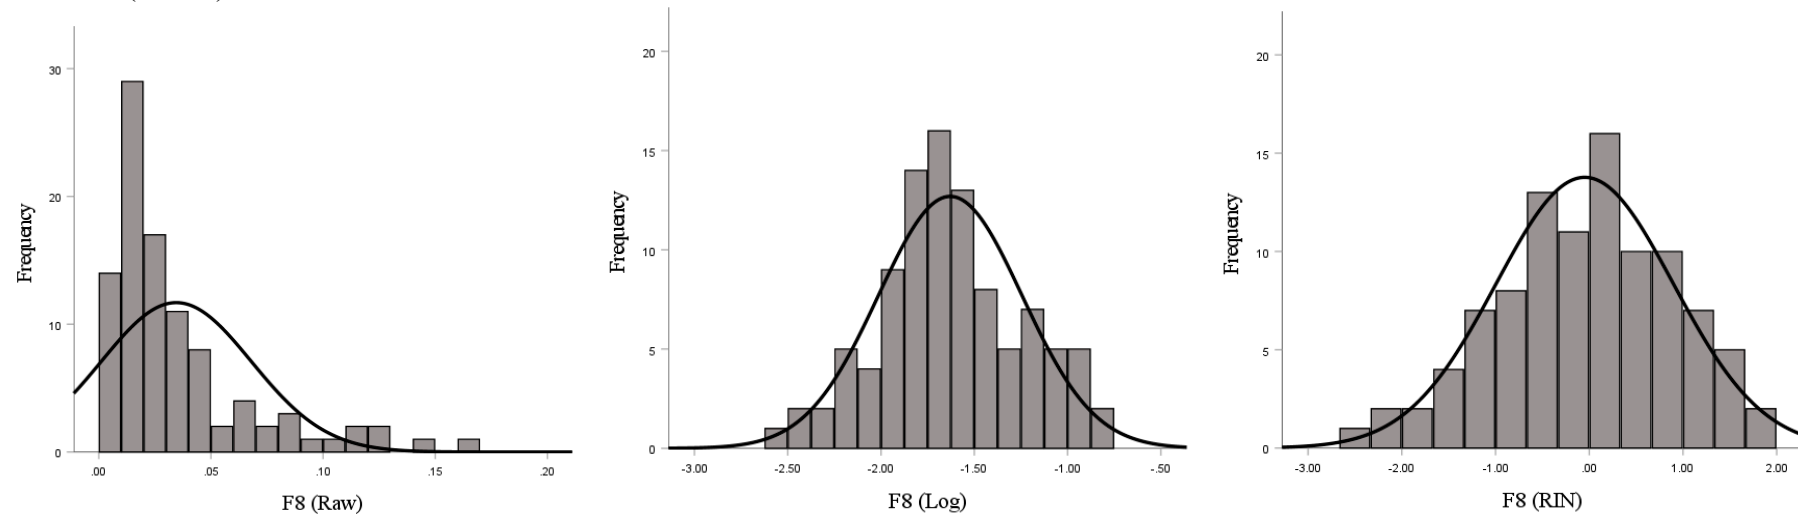

Figure S7. Frequency distribution histograms for raw (untransformed), log-transformed, and RIN-transformed FT7 EEG site data for eyes-closed condition ( $n = 98$ ).

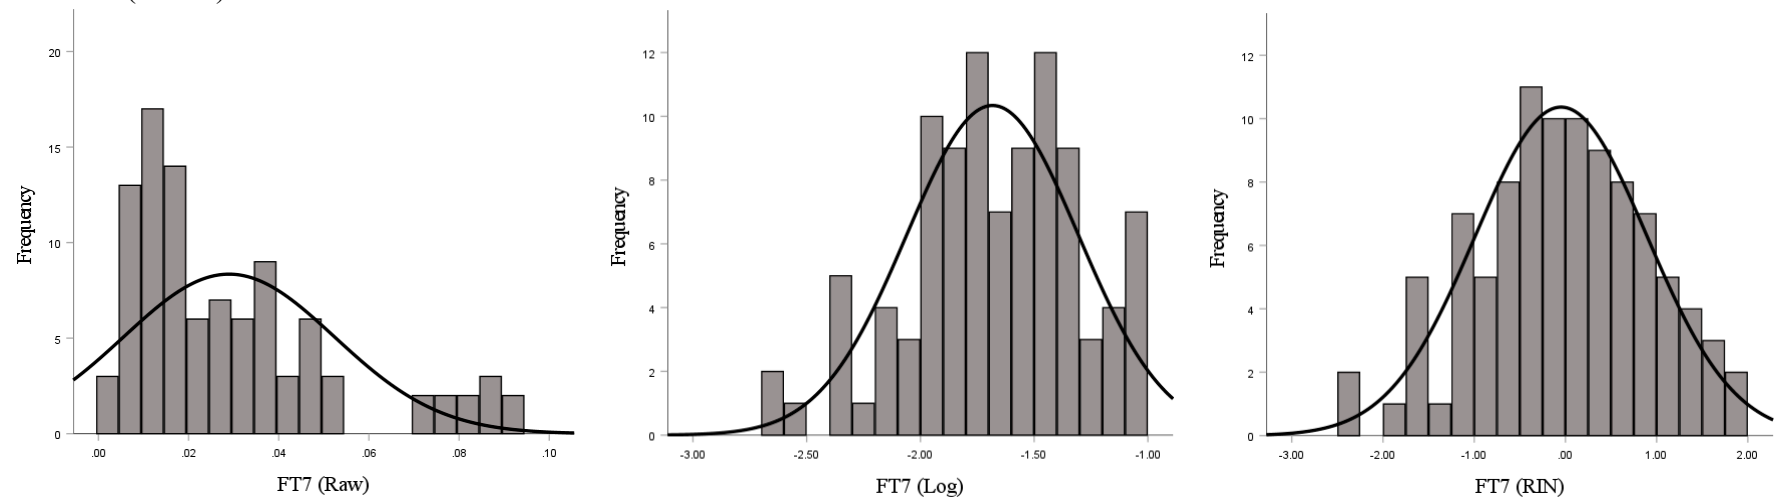

Figure S8. Frequency distribution histograms for raw (untransformed), log-transformed, and RIN-transformed FT8 EEG site data for eyes-closed condition ( $n = 98$ ).

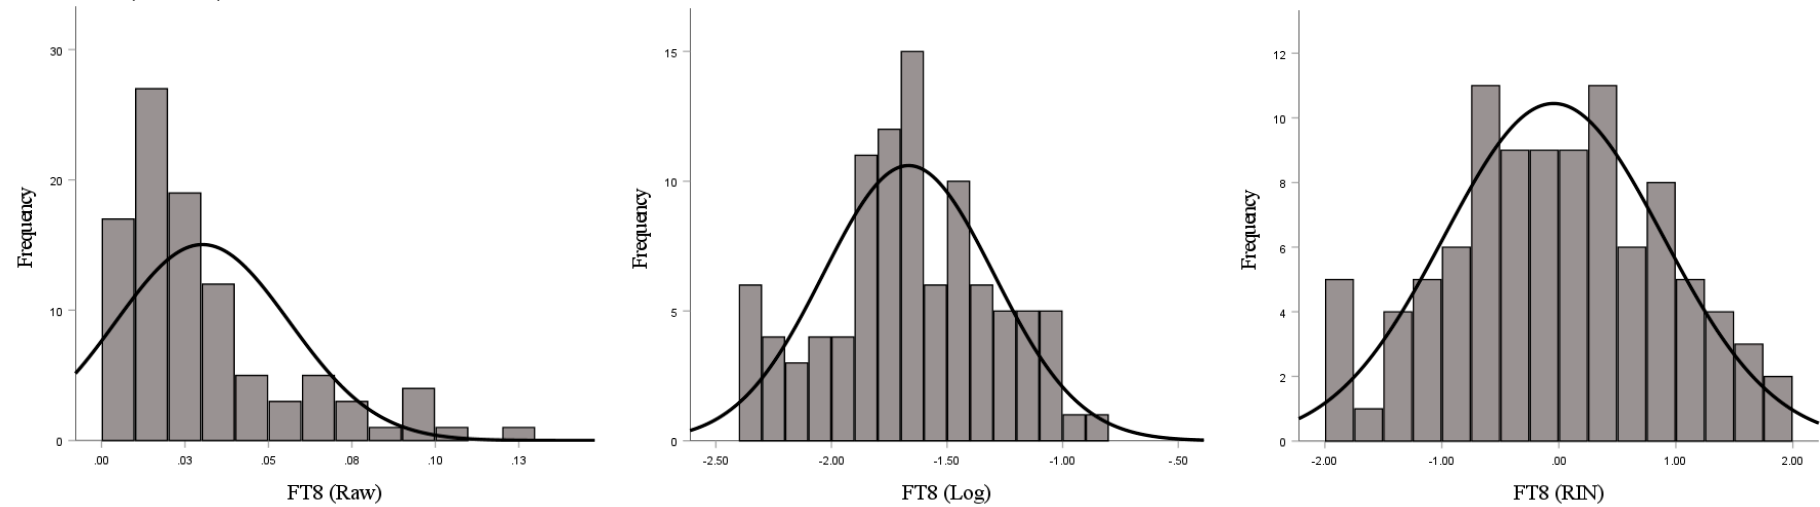

Figure S9. Frequency distribution histograms for raw (untransformed), log-transformed, and RIN-transformed FC3 EEG site data for eyes-closed condition ( $n = 98$ ).

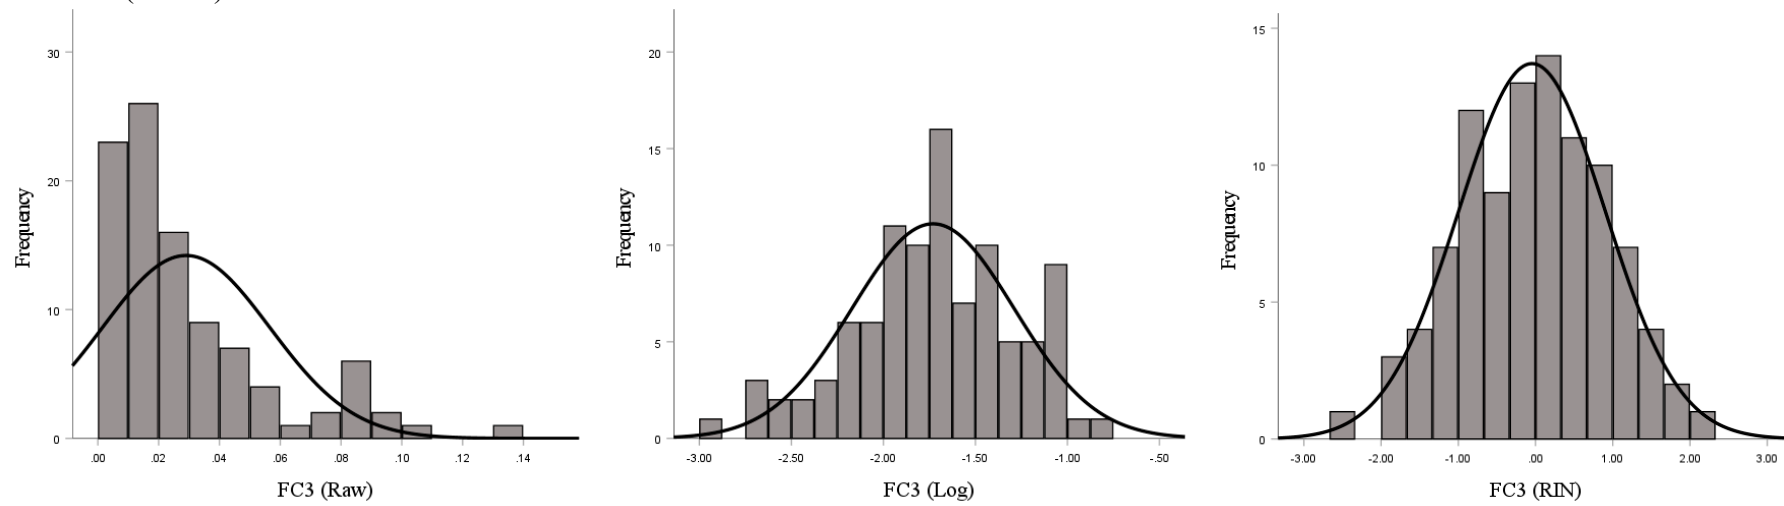

Figure S10. Frequency distribution histograms for raw (untransformed), log-transformed, and RIN-transformed FC4 EEG site data for eyes-closed condition ( $n = 98$ ).

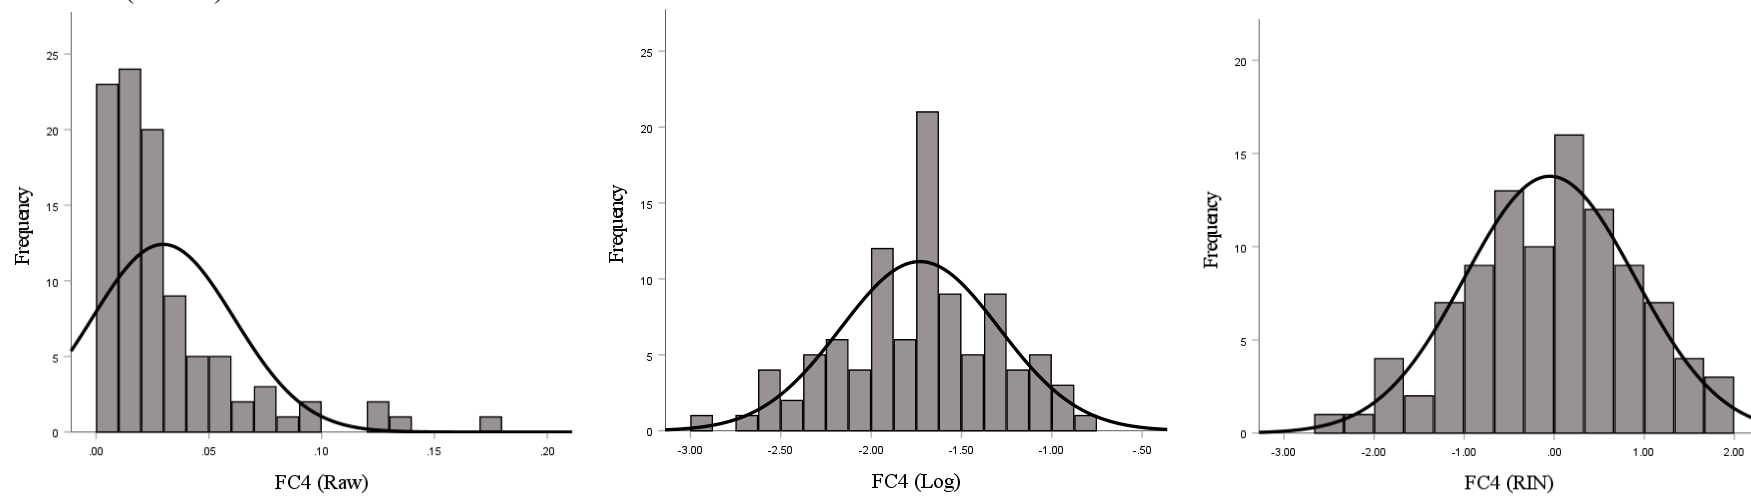

Figure S11. Frequency distribution histograms for raw (untransformed), log-transformed, and RIN-transformed FP1 EEG site data for eyes-open condition ( $n = 95$ ).

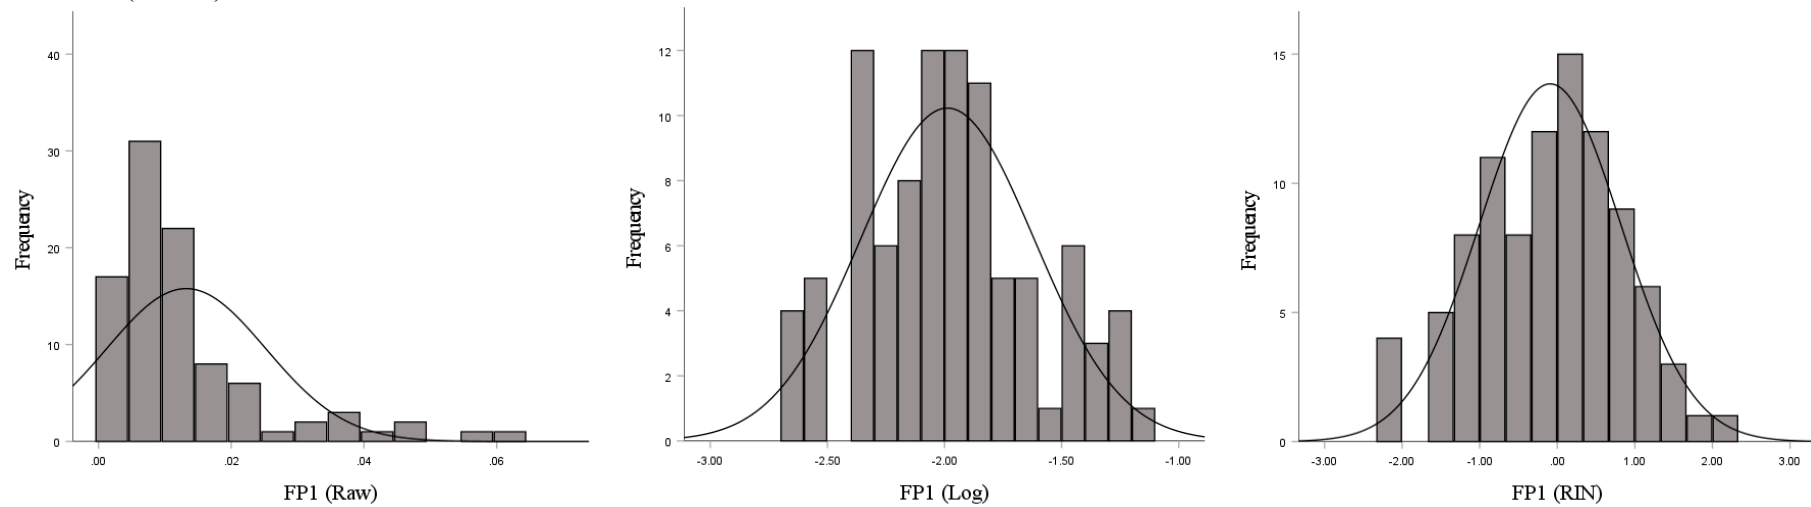

Figure S12. Frequency distribution histograms for raw (untransformed), log-transformed, and RIN-transformed FP2 EEG site data for eyes-open condition ( $n = 95$ ).

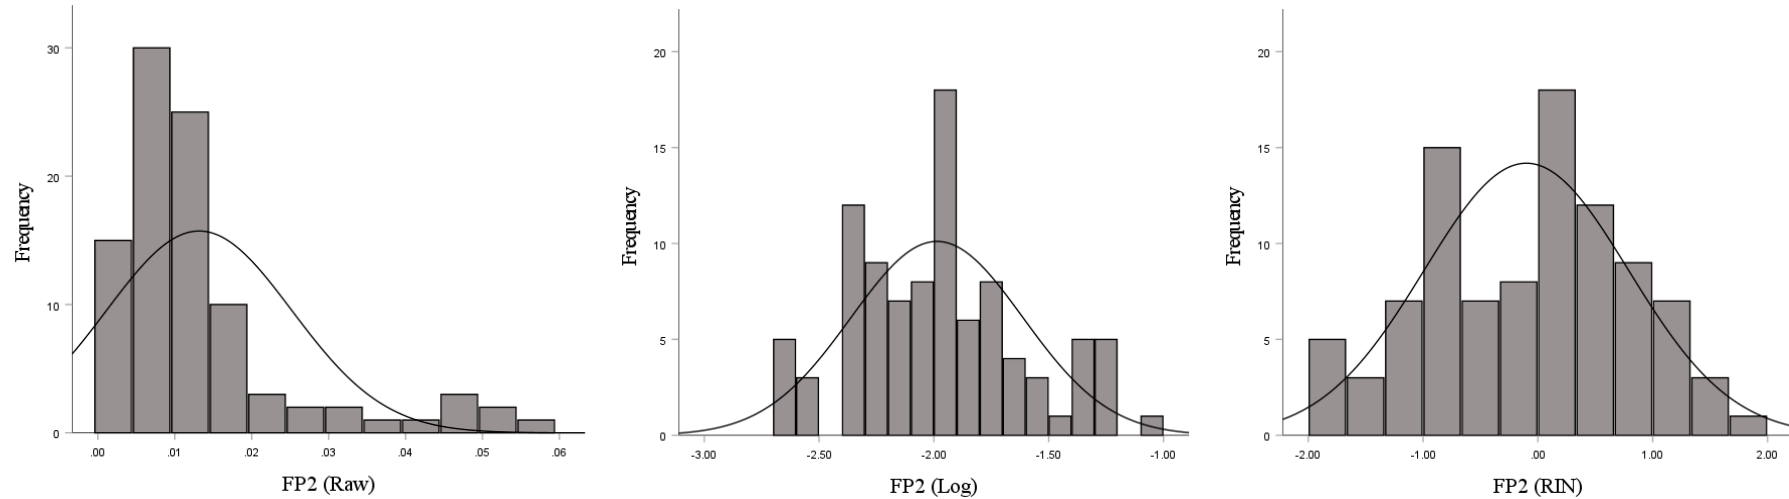

Figure S13. Frequency distribution histograms for raw (untransformed), log-transformed, and RIN-transformed F3 EEG site data for eyes-open condition ( $n = 95$ ).

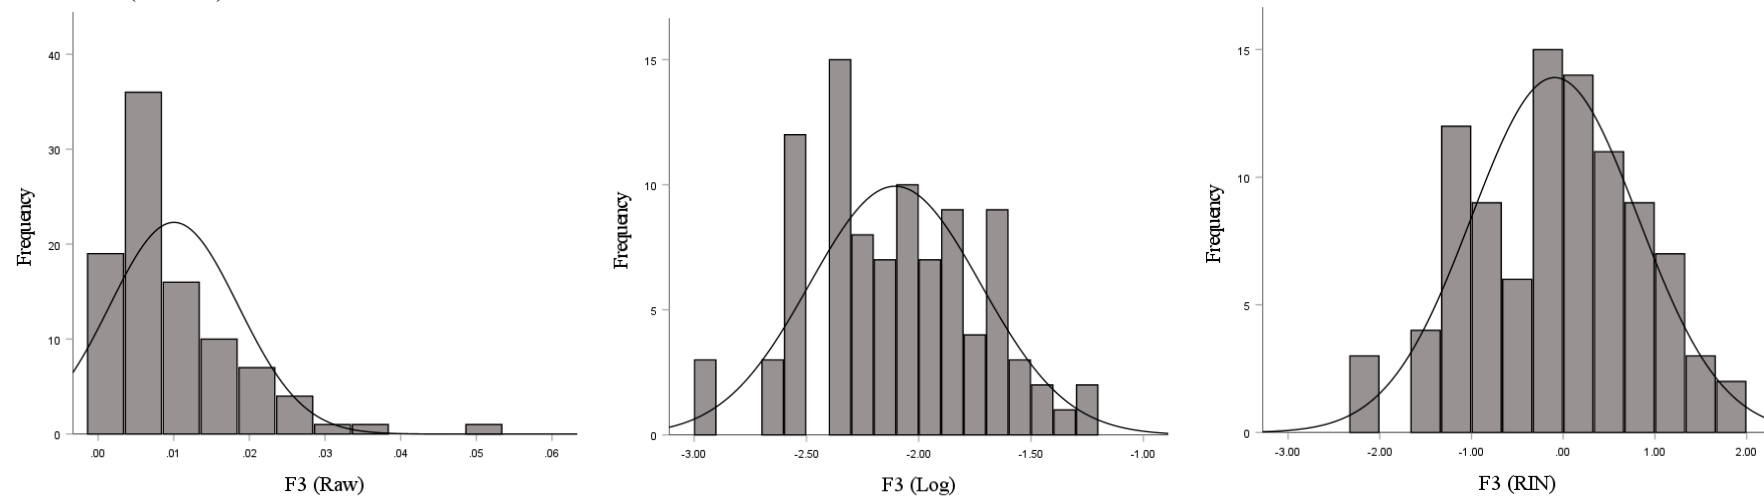

Figure S14. Frequency distribution histograms for raw (untransformed), log-transformed, and RIN-transformed F4 EEG site data for eyes-open condition ( $n = 95$ ).

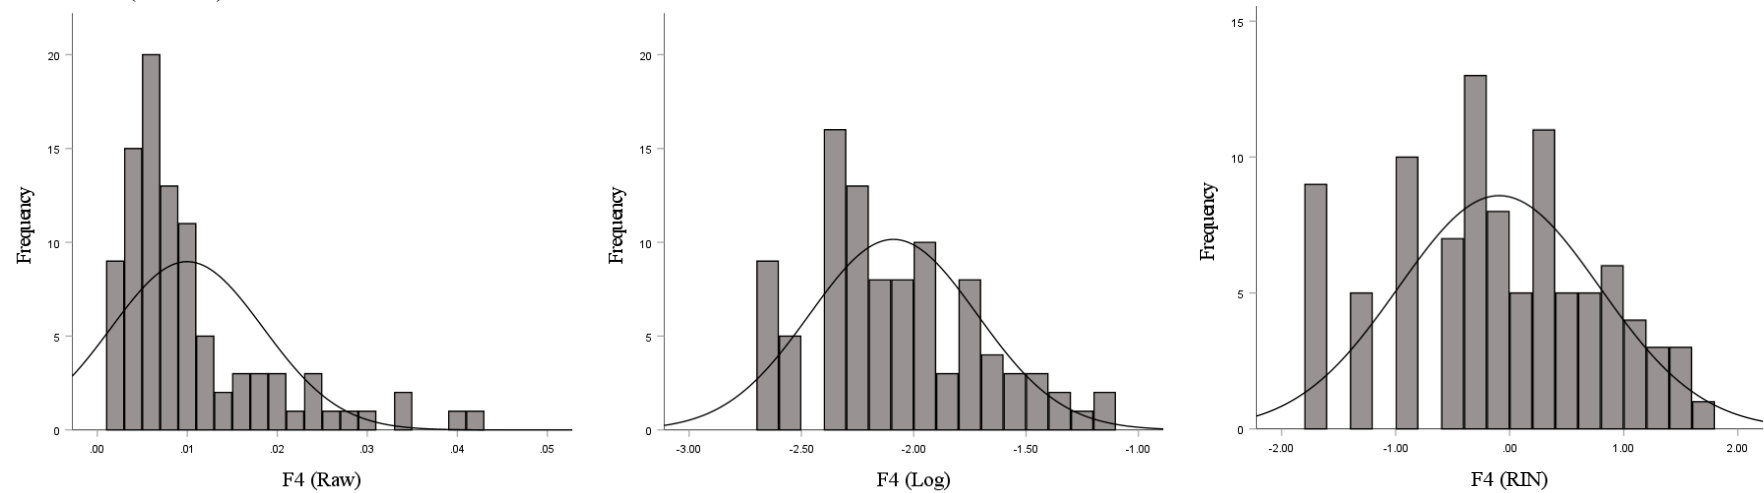

Figure S15. Frequency distribution histograms for raw (untransformed), log-transformed, and RIN-transformed F7 EEG site data for eyes-open condition ( $n = 95$ ).

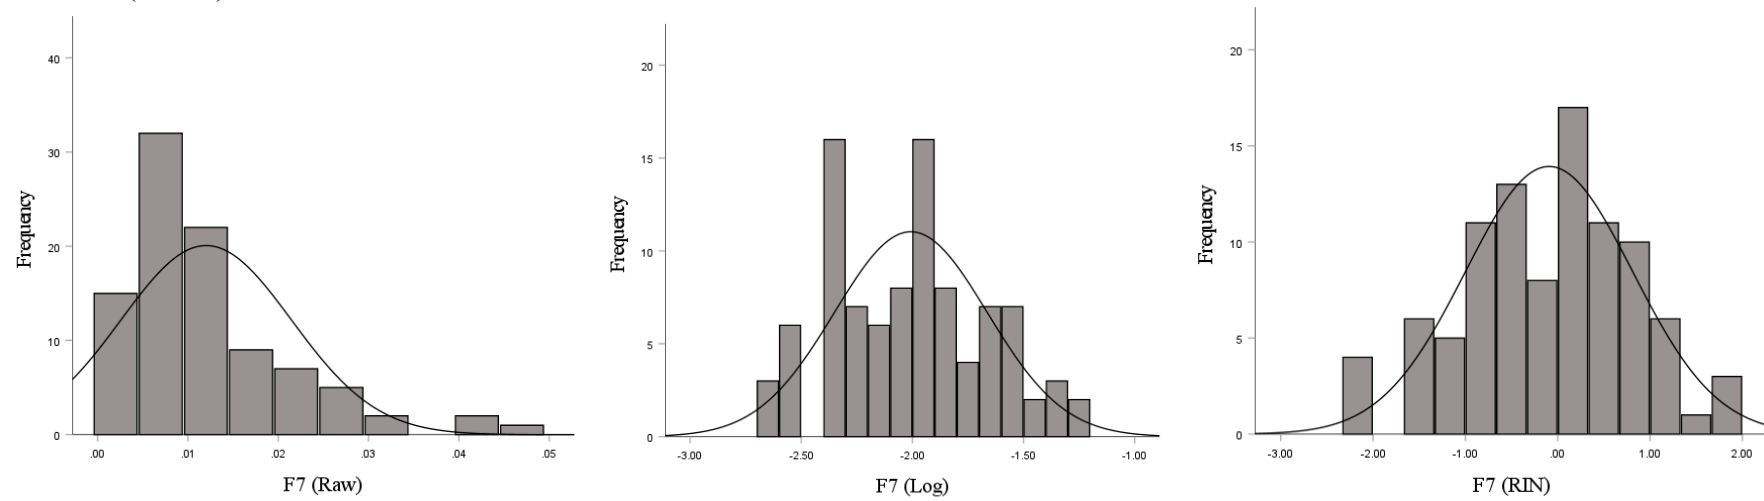

Figure S16. Frequency distribution histograms for raw (untransformed), log-transformed, and RIN-transformed F8 EEG site data for eyes-open condition ( $n = 95$ ).

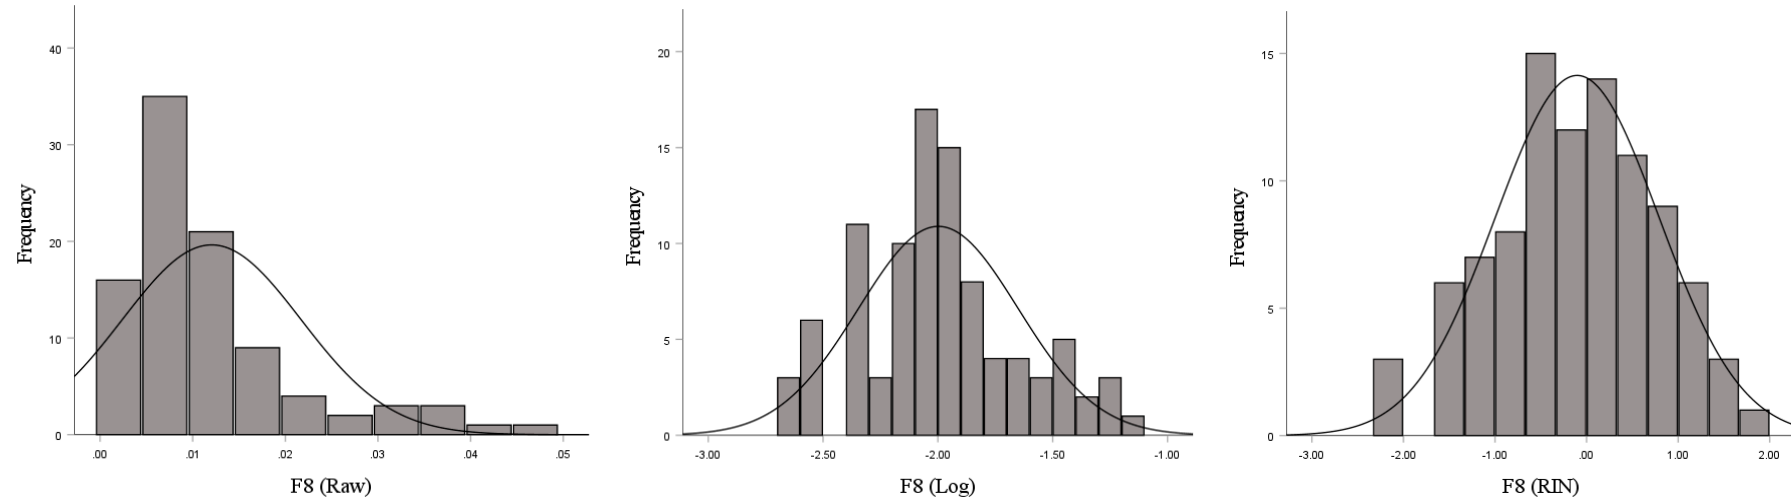



Figure S17. Frequency distribution histograms for raw (untransformed), log-transformed, and RIN-transformed FT7 EEG site data for eyes-open condition ( $n = 95$ ).

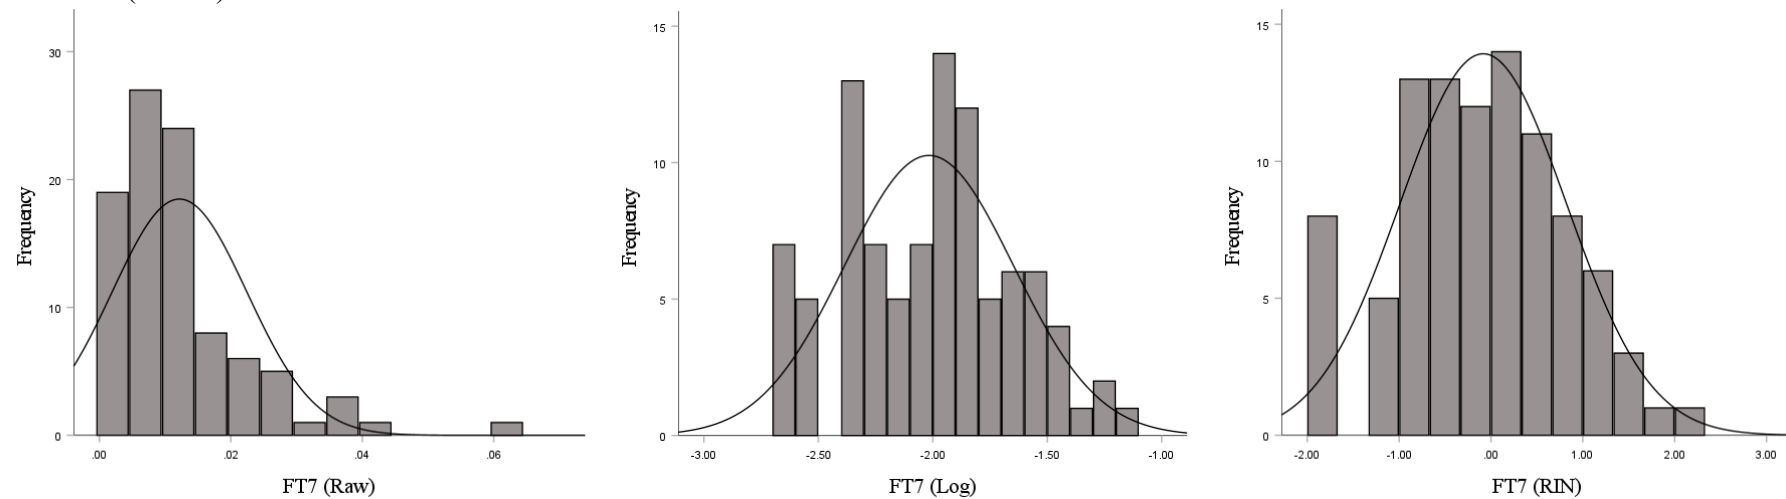

Figure S18. Frequency distribution histograms for raw (untransformed), log-transformed, and RIN-transformed FT8 EEG site data for eyes-open condition ( $n = 95$ ).

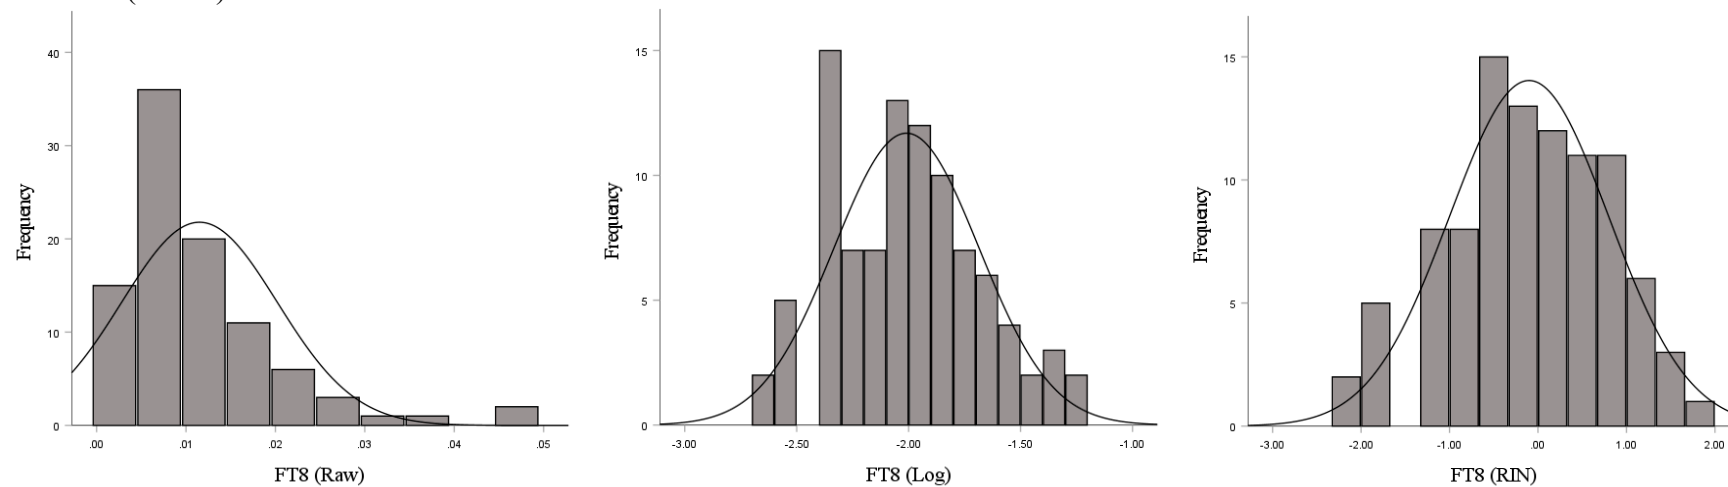

Figure S19. Frequency distribution histograms for raw (untransformed), log-transformed, and RIN-transformed FC3 EEG site data for eyes-open condition ( $n = 95$ ).

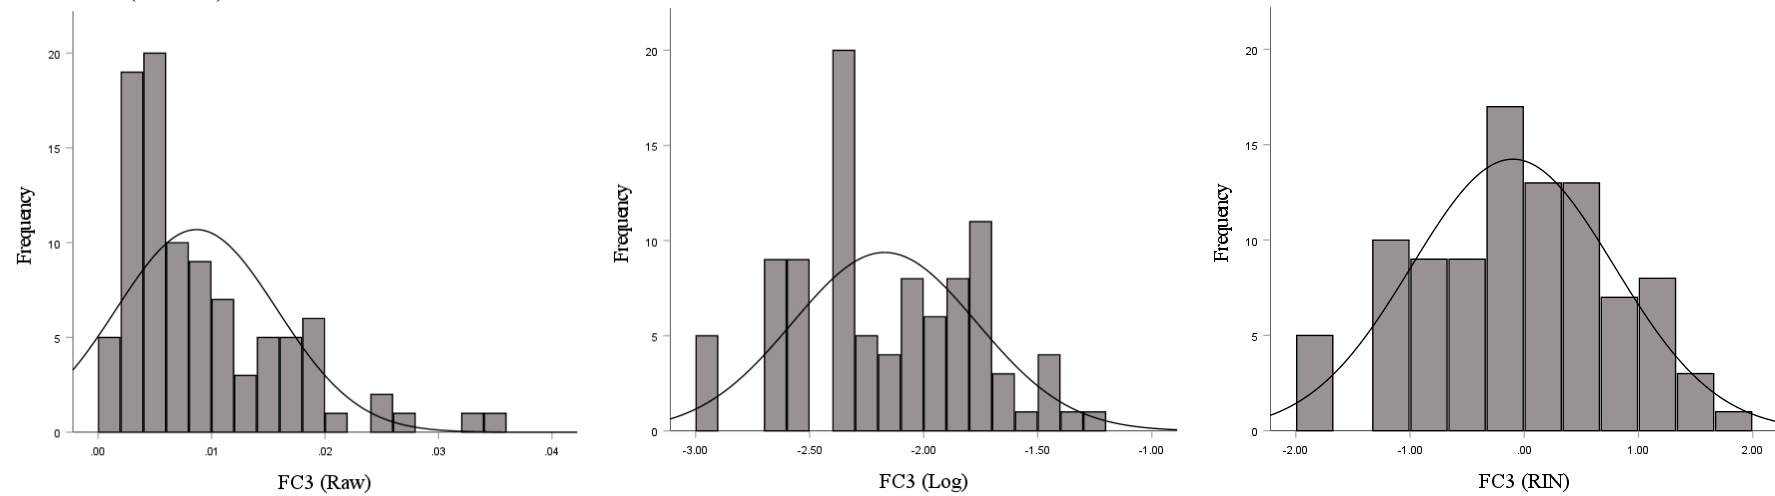

Figure S20. Frequency distribution histograms for raw (untransformed), log-transformed, and RIN-transformed FC4 EEG site data for eyes-open condition ( $n = 95$ ).

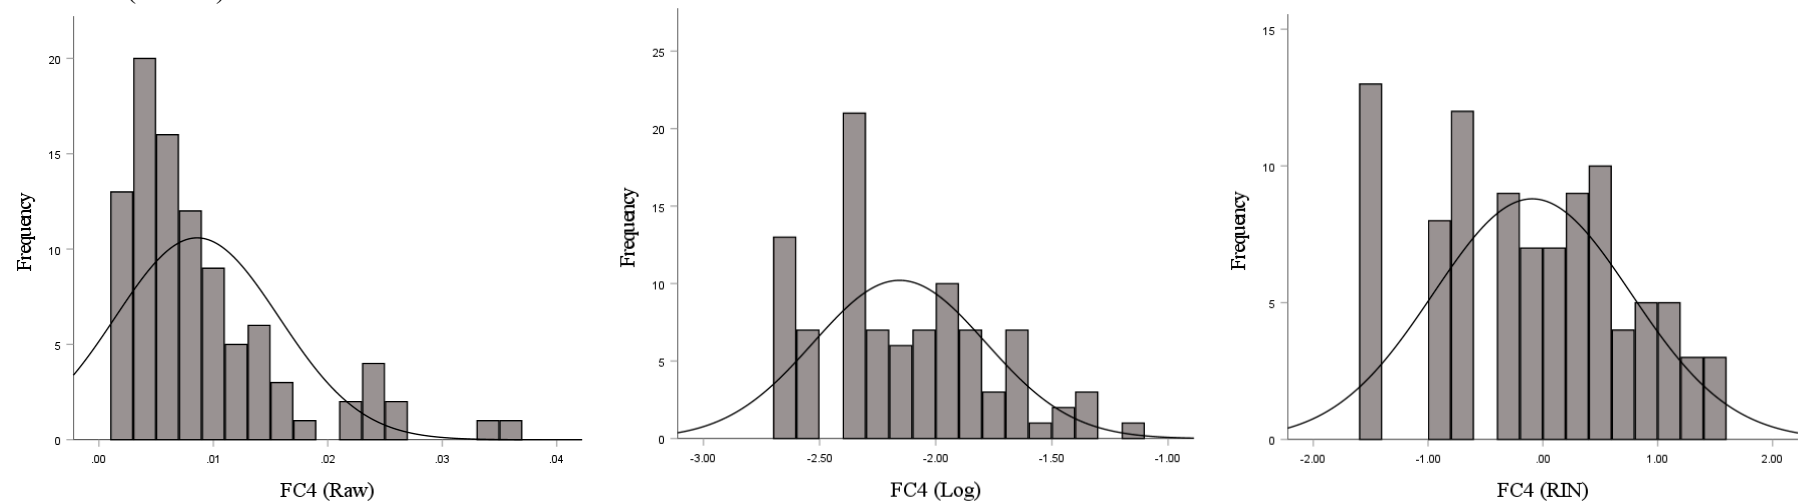

Supplement: s1 [file s1]
