# Supplementary material for: Studies of EEG Asymmetry and Depression: To Normalise or Not?
Source: MDPI journal article supplement (doi:10.3390/sym15091689), 2023-09-02
Supplement: s1 [file s1]

Archive with 1 entries (1 files):
- symmetry-2589305-supplementary.pdf
